# Supplementary material
Source: PubMed Central journal article supplement (PMC3121542)
Supplement: sxd0005-0124-s01.pdf [file sxd0005-0124-s01.pdf]

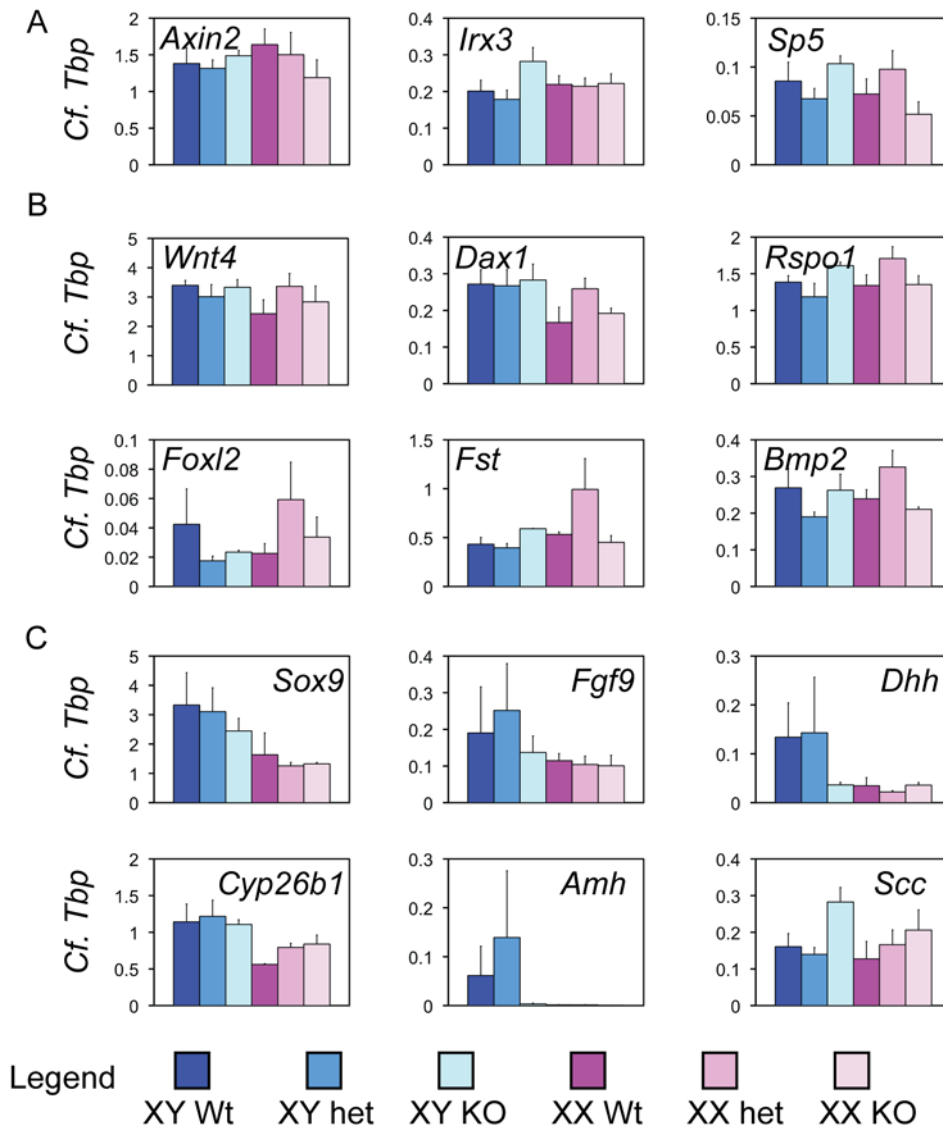

Supplementary Figure 1.

Testis development in the *Dkk1* null appears normal with respect to expression of marker genes. qRT-PCR analysis of transcriptional targets of the canonical WNT pathway (A), markers of ovarian development (B) and markers of testicular development (C) in 11.5 dpc UGR samples from wild-type (Wt), heterozygous (het) and null (KO) *Dkk1* embryos. Bars indicate the mean  $\pm$  1 SEM, n = 3, 3, 3, 2, 4, 3. Endogenous control *Tbp* (encoding TATA box binding protein) was used to normalize gene expression levels. Although no changes were significant, *Amh* and *Scc* were not up-regulated by 11.5 dpc in *Dkk1*-null XY gonads, though they were in wild-type and *Dkk1*-heterozygous gonads. This did not seem to signify delayed testis development, however, since *Dhh* expression was actually higher at 11.5 dpc in the *Dkk1*-null gonads: expression of these markers of testis development was quite variable among samples at 11.5 dpc.

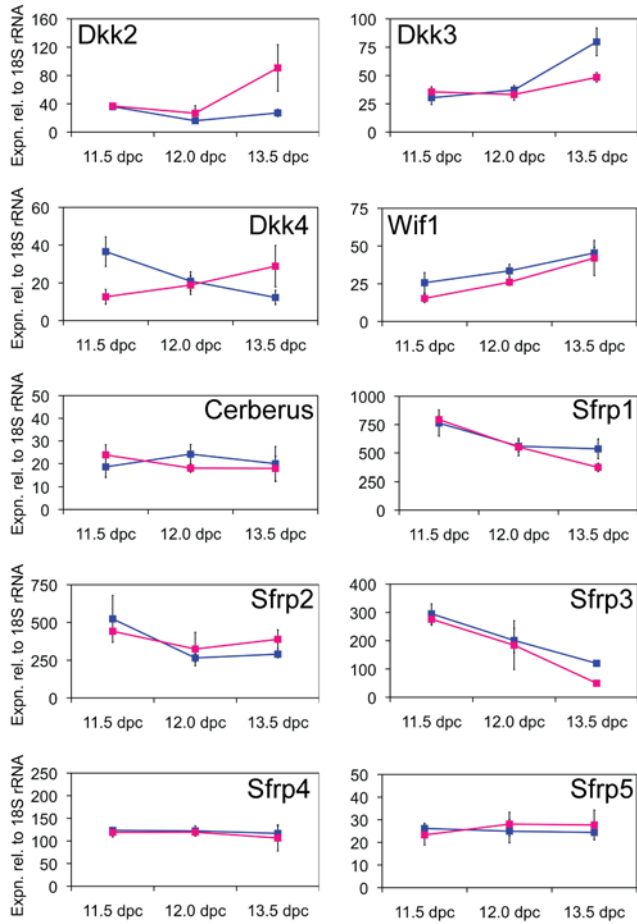

Supplementary Figure 2.

Expression of WNT inhibitors in testis. Expression of Dkk2 (1420512\_at), Dkk3 (1417312\_at), Dkk4 (1425447\_at), Wif (1425425\_a\_at), Cerberus (1450256\_at), Sfrp (1448395\_at), Sfrp2 (1448201\_at), Sfrp3 (1416658\_at), Sfrp4 (1451031\_at), Sfrp5 (1426075\_at), as detected by Affymetrix microarray screening.
